# Supplementary material for: Structures of multinuclear U(vi) species on the hydroxylated α-SiO2(001) surface: insights from DFT calculations
Source: Royal Society of Chemistry journal article supplement (doi:10.1039/d3cp04941h), 2024-01-01
Supplement: d3cp04941h1.pdf [file d3cp04941h1.pdf]

## Supporting Information

### Structures of Multinuclear U(VI) Species on Hydroxylated $\alpha$ -SiO<sub>2</sub>

#### (001) Surface: Insights from DFT Calculations

**Pengyuan Gao**<sup>a,b,d</sup>, **Qiang Jin**<sup>a,b</sup>, **Zongyuan Chen**<sup>a,b</sup>, **Dongqi Wang**<sup>c</sup>, **Christophe Tournassat**<sup>d,e</sup>, **Zhijun Guo**<sup>a,b\*</sup>

<sup>a</sup> Radiochemistry Laboratory, School of Nuclear Science and Technology, Lanzhou University, 730000 Lanzhou, China

<sup>b</sup> Frontiers Science Center for Rare Isotopes, Lanzhou University, 730000 Lanzhou, China

<sup>c</sup> State Key Laboratory of Fine Chemicals, Liaoning Key Laboratory for Catalytic Conversion of Carbon Resources, School of Chemical Engineering, Dalian University of Technology, Dalian, 116024, Liaoning, China

<sup>d</sup> Institut des Sciences de la Terre d'Orléans, Université d'Orléans-CNRS-BRGM, Orléans 45071, France

<sup>e</sup> Earth and Environmental Sciences Area, Lawrence Berkeley National Laboratory, Berkeley, California 94720, USA

**\*Corresponding author:**

**Tel.: +86 931 8913278;**

**Fax: +86 931 8913551**

**E-mail address: guozhj@lzu.edu.cn (Z.J. Guo)**

**Table S1.** Structural parameters (in Å), binding energies (in eV), and bond/dihedral angles of surface complexes of  $(\text{UO}_2)_2(\text{OH})^{3+}$  and  $(\text{UO}_2)_2(\text{OH})_2^{2+}$  at  $\equiv\text{SiOHO}(\text{H})$ - $\text{SiOHO}(\text{H})$ ,  $\equiv\text{SiOHO}(\text{H})$  and  $\equiv\text{SiOHSiO}(\text{H})$  sites.

| Bind mode | Adsorbate                           | Surface site                 | U-O <sub>s</sub>          | U-U  | U-Si       | H <sub>w</sub> -O <sub>s</sub> | H <sub>s</sub> -O <sub>yl</sub> | H <sub>b</sub> -O <sub>s</sub> | $\angle\text{UO}(\text{O})\text{U}^a$ | $\Delta E_{\text{bind}}$ |
|-----------|-------------------------------------|------------------------------|---------------------------|------|------------|--------------------------------|---------------------------------|--------------------------------|---------------------------------------|--------------------------|
| End-on    | $(\text{UO}_2)_2(\text{OH})^{3+}$   | $\equiv\text{SiOHO}$         | 2.20, 2.84                | 4.69 | 3.22       | 2.07, 2.22                     | -                               | -                              | 165.57 (158.20)                       | -3.61                    |
|           | $(\text{UO}_2)_2(\text{OH})_2^{2+}$ | $\equiv\text{SiOHO}$         | 2.22, 2.63                | 3.68 | 3.10       | -                              | -                               | -                              | 154.25 (164.46)                       | -2.75                    |
|           | $(\text{UO}_2)_2(\text{OH})^{3+}$   | $\equiv\text{SiOHOH}$        | 2.60, 2.69                | 4.61 | 3.42       | 1.65                           | -                               | -                              | 153.66 (158.20)                       | -1.50                    |
|           | $(\text{UO}_2)_2(\text{OH})_2^{2+}$ | $\equiv\text{SiOHOH}$        | 2.56, 2.70                | 3.70 | 3.38       | -                              | -                               | -                              | 155.02 (164.46)                       | -1.26                    |
|           | $(\text{UO}_2)_2(\text{OH})^{3+}$   | $\equiv\text{SiOHSiO}$       | 2.16, 2.58                | 4.67 | 3.58, 4.00 | 2.05                           | -                               | -                              | 166.35 (158.20)                       | -4.21                    |
|           | $(\text{UO}_2)_2(\text{OH})_2^{2+}$ | $\equiv\text{SiOHSiO}$       | 2.11, 2.49                | 3.76 | 3.60, 3.93 | 1.82                           | -                               | -                              | 158.78 (164.46)                       | -3.48                    |
|           | $(\text{UO}_2)_2(\text{OH})^{3+}$   | $\equiv\text{SiOHSiOH}$      | 2.51, 2.69                | 4.74 | 3.94, 4.02 | 1.88, 2.26                     | -                               | -                              | 166.31 (158.20)                       | -1.56                    |
|           | $(\text{UO}_2)_2(\text{OH})_2^{2+}$ | $\equiv\text{SiOHSiOH}$      | 2.52, 2.54                | 3.71 | 3.91, 4.08 | 1.65                           | -                               | -                              | 158.41 (164.46)                       | -1.50                    |
| Side-on   | $(\text{UO}_2)_2(\text{OH})^{3+}$   | $\equiv\text{SiOHO-SiOHO}$   | 2.43, 2.43,<br>2.53, 2.77 | 4.43 | 3.34, 3.22 | 1.97                           | -                               | -                              | 142.28 (158.20)                       | -5.66                    |
|           | $(\text{UO}_2)_2(\text{OH})^{3+}$   | $\equiv\text{SiOHOH-SiOHOH}$ | 2.54, 2.60,<br>2.75, 2.79 | 4.58 | 3.45, 3.46 | 2.01                           | -                               | -                              | 154.21 (158.20)                       | -2.73                    |
|           | $(\text{UO}_2)_2(\text{OH})_2^{2+}$ | $\equiv\text{SiOHvSiO}$      | 2.22, 3.05                | 3.92 | 3.83, 4.48 | 1.70                           | 1.63                            | 2.01                           | 164.10 (164.46)                       | -2.62                    |
|           | $(\text{UO}_2)_2(\text{OH})_2^{2+}$ | $\equiv\text{SiOHvSiOH}$     | 2.59, 3.10                | 3.85 | 4.17, 4.53 | 1.80, 1.94                     | 1.68                            | 1.75                           | 157.91 (164.46)                       | -1.33                    |

<sup>a</sup> The values in brackets are the angles of the corresponding molecules.

**Table S2.** U-U distances measured by EXAFS for different U(VI) adsorption systems<sup>1-5</sup>

| System             | U(VI) initial concentration ( $\mu\text{M}$ ) | pH        | U-U distance( $\text{\AA}$ ) |
|--------------------|-----------------------------------------------|-----------|------------------------------|
| U(VI)-Silica       | 41.5                                          | 6.46      | 3.97                         |
| U(VI)-Alumina      | 41.8/1000                                     | 6.50/9.00 | 4.01/3.91                    |
| U(VI)-Gibbsite     | 10                                            | 5.60/9.70 | 4.30/3.92                    |
| U(VI)- Hematite    | 12-133                                        | 6.39-8.49 | 3.85-3.92                    |
| U(VI)-Al hydroxide | 1.26-960                                      | 3.00-6.90 | 3.91-3.93                    |

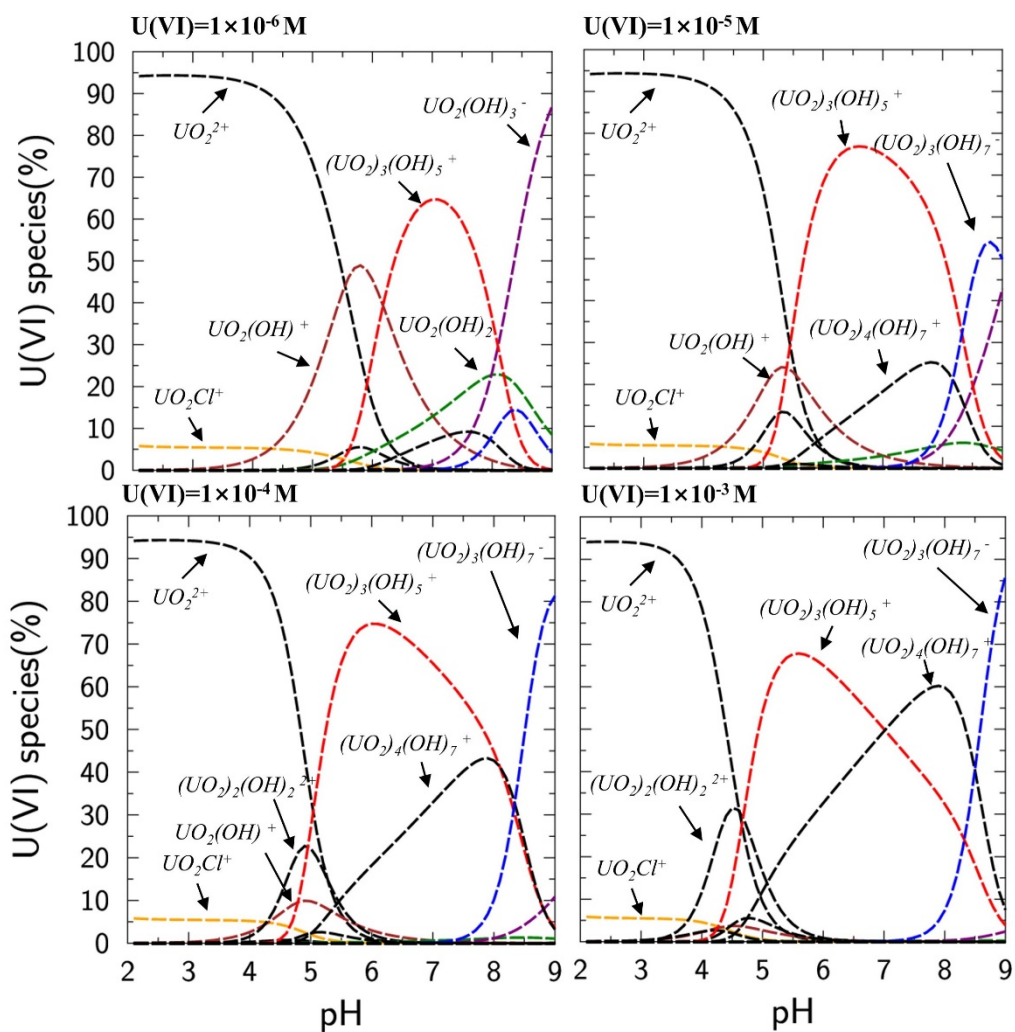

**Fig. S1.** U(VI) speciation at concentrations of  $10^{-6}$ - $10^{-3}$  M in 0.1 mol/L NaCl solution at 25°C. The PHREEQC code with THERMOCHEM v.11a thermodynamic database was used in speciation calculations.<sup>6</sup>

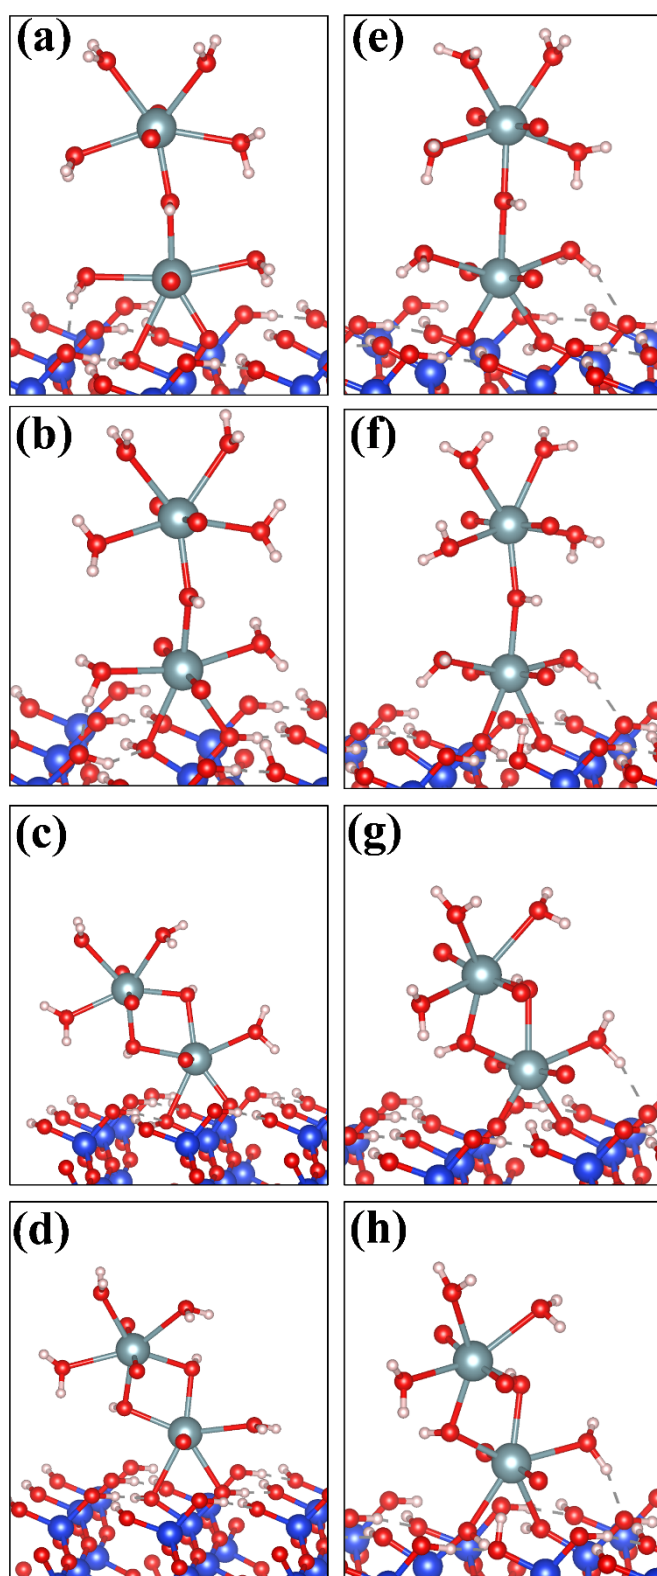

**Fig. S2.** Configurations of the end-on surface complexes of  $(\text{UO}_2)_2(\mu\text{-OH})(\text{H}_2\text{O})_8^{3+}$  and  $(\text{UO}_2)_2(\mu\text{-OH})_2(\text{H}_2\text{O})_6^{2+}$  at (a)-(d)  $\equiv\text{SiOHO(H)}$  and (e)-(h)  $\equiv\text{SiOHSiO(H)}$ .

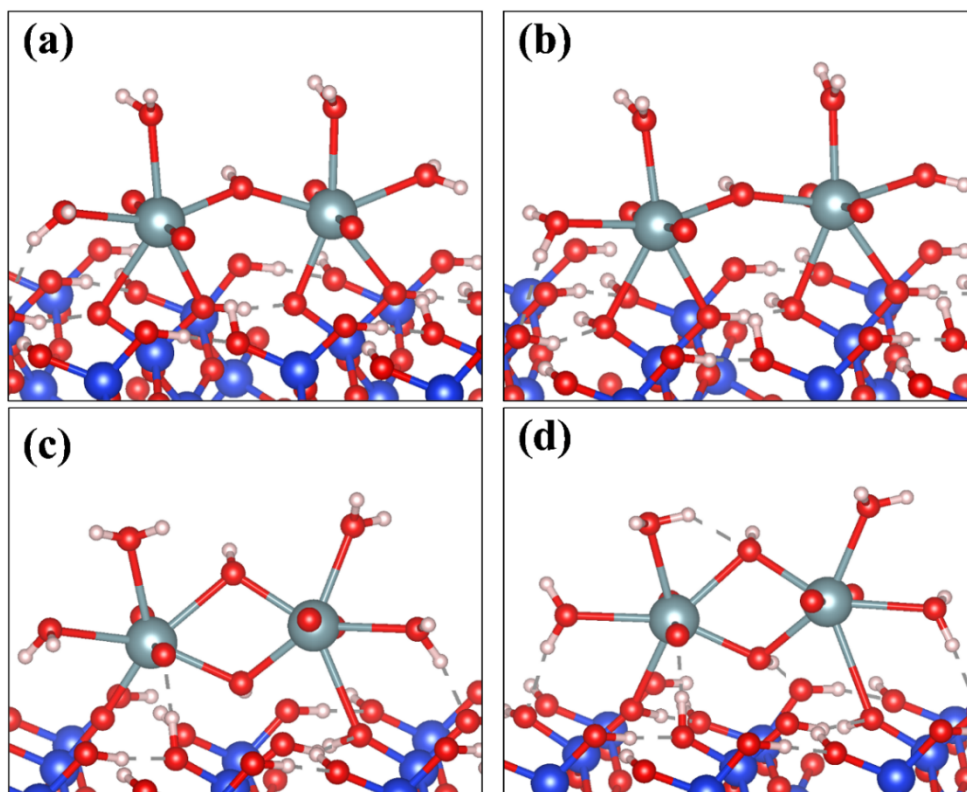

**Fig. S3.** Configurations of the side-on surface complexes of (a)-(b)  $(\text{UO}_2)_2(\mu\text{-OH})(\text{H}_2\text{O})_8^{3+}$  at  $\equiv\text{SiOHO(H)-SiOHO(H)}$  and those of (c)-(d)  $(\text{UO}_2)_2(\mu\text{-OH})_2(\text{H}_2\text{O})_6^{2+}$  at  $\equiv\text{SiOHvSiO(H)}$ .

## References

1. E. R. Sylwester, E. A. Hudson, and P. G. Allen, *Geochim. Cosmochim. Acta*, 2000, **64**, 2431–2438.
2. Y. Tang, and R. J. Reeder, *Geochim. Cosmochim. Acta*, 2009, **73**, 2727–2743.
3. T. Hattori, T. Saito, K. Ishida, A. C. Scheinost, T. Tsuneda, S. Nagasaki, and S. Tanaka, *Geochim. Cosmochim. Acta*, 2009, **73**, 5975–5988.
4. J. R. Bargar, R. Reitmeyer, J. J. Lenhart and J. A. Davis, *Geochim. Cosmochim. Acta*, 2000, **64**, 2737–2749.
5. A. Froideval, M. Del Nero, C. Gaillard, R. Barillon, I. Rossini and J. L. Hazemann, *Geochim. Cosmochim. Acta*, 2006, **70**, 5270–5284.
6. E. Giffaut, M. Grivé, P. Blanc, P. Vieillard, E. Colàs, H. Gailhanou, S. Gaboreau, N. Marty, B. Madé and L. Duro, *Appl. Geochem.*, 2014, **49**, 225-236.
